# Supplementary material for: Two-dimensional porous cuprous oxide nanoplatelets derived from metal–organic frameworks (MOFs) for efficient photocatalytic dye degradation under visible light
Source: Royal Society of Chemistry journal article supplement (doi:10.1039/c8dt01117f), 2018-01-01
Supplement: c8dt01117f1.pdf [file c8dt01117f1.pdf]

## Supporting Information

### **Two-dimensional porous cuprous oxide nanoplatelets derived from metal-organic frameworks (MOFs) for efficient photocatalytic dye degradation under visible light**

Yi-fan Lin,<sup>a,b</sup> Hao Wan,<sup>a,b</sup> Fashen Chen,<sup>a,b</sup> Xiaohe Liu,<sup>\*a</sup> Renzhi Ma,<sup>\*b</sup> Takayoshi Sasaki<sup>b</sup>

<sup>a</sup>School of Materials Science and Engineering, Central South University, Changsha,

Hunan 410083, P. R. China. Email: liuxh@csu.edu.cn.

<sup>b</sup>International Center for Materials Nanoarchitectonics (WPI-MANA), National

Institute for Materials Science (NIMS), Namiki 1-1, Tsukuba, Ibaraki 305-0044,

Japan. Email: MA.Renzhi@nims.go.jp.

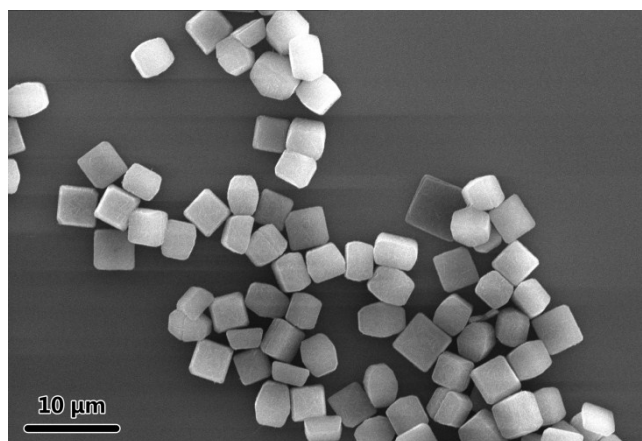

**Fig. S1** SEM image of the Cu-based MOFs synthesized without PVP.

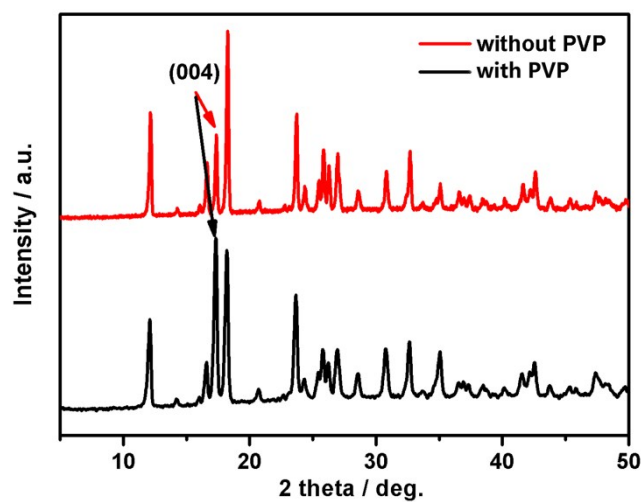

**Fig. S2** XRD comparison of products synthesized with and without PVP addition.

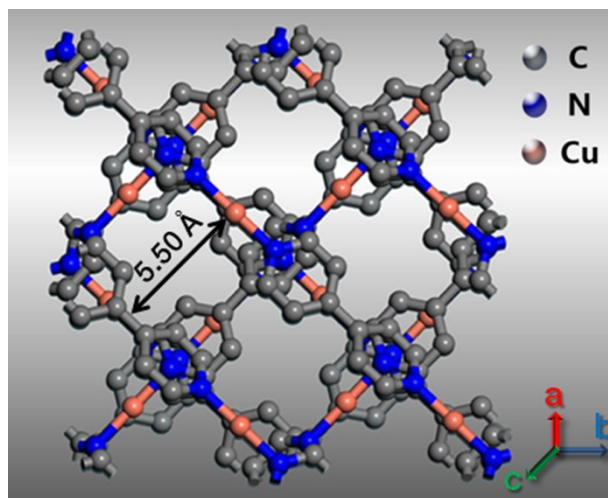

**Fig. S3** Schematic for channels constructed by crossweaved chains along [001] direction. The hydrogen atoms and coordinated nitrate ions are omitted for clarity.

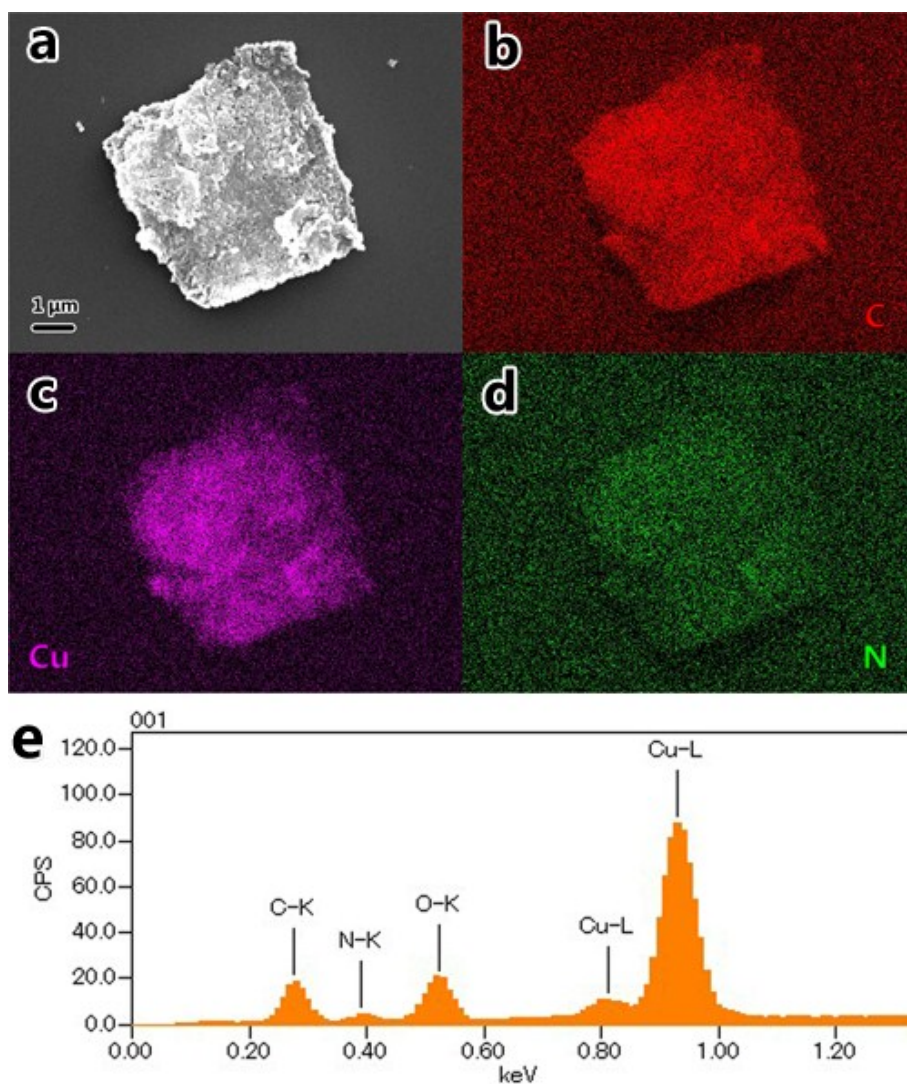

**Fig. S4** a) SEM image of a nanoplatelet and corresponding EDS elemental mapping of carbon b), copper c) and nitrogen d). e) spectrum of the N-doped  $\text{Cu}_2\text{O}$ /carbon nanoplatelets.

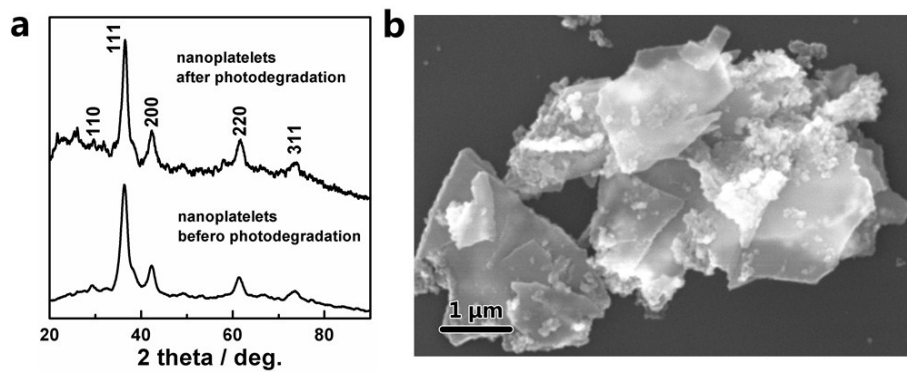

**Fig. S5** a) XRD comparison of N-doped Cu<sub>2</sub>O/carbon composite before and after photodegradation. A few small peaks observed in the region of 20 to 30 degree could be assigned to the residual MO molecules. b) SEM image of nanoplatelets recovered after photodegradation.
